# Supplementary material for: Garcinol and Anacardic Acid, Natural Inhibitors of Histone Acetyltransferases, Inhibit Rhabdomyosarcoma Growth and Proliferation
Source: MDPI journal article supplement (doi:10.3390/molecules28145292), 2023-07-08
Supplement: s1 [file s1]

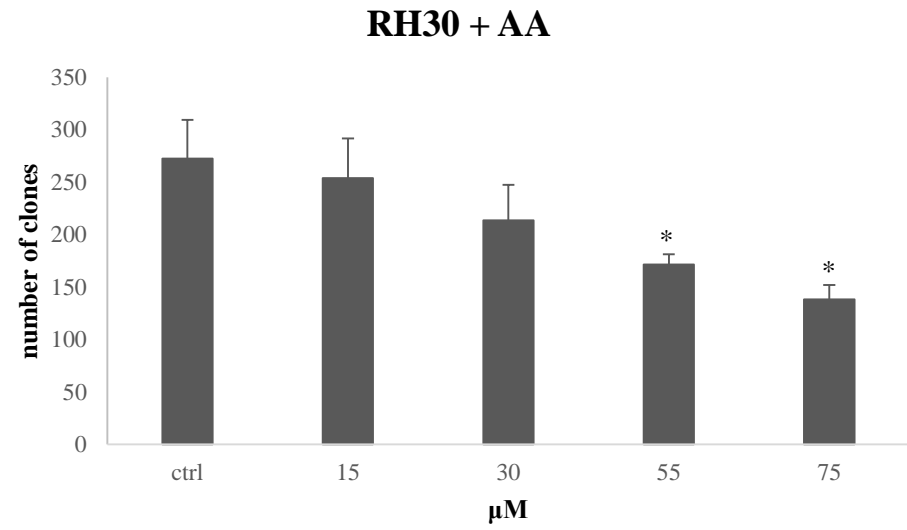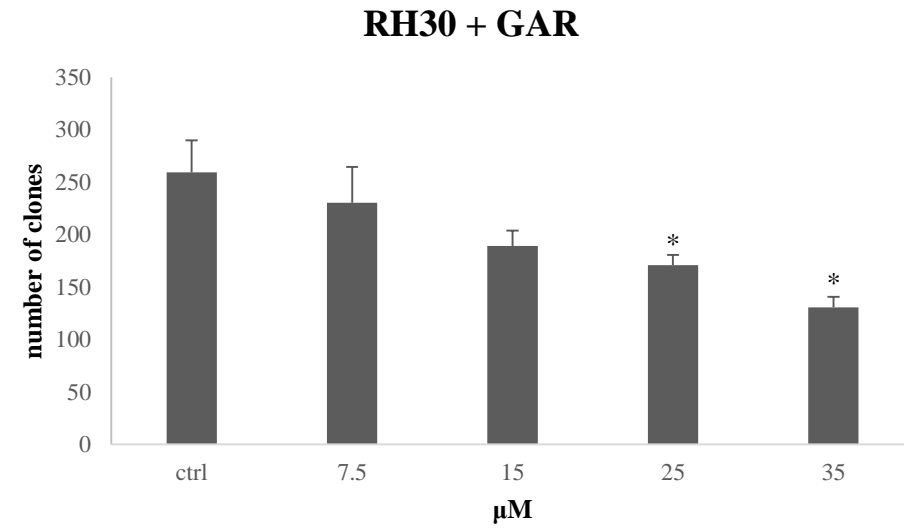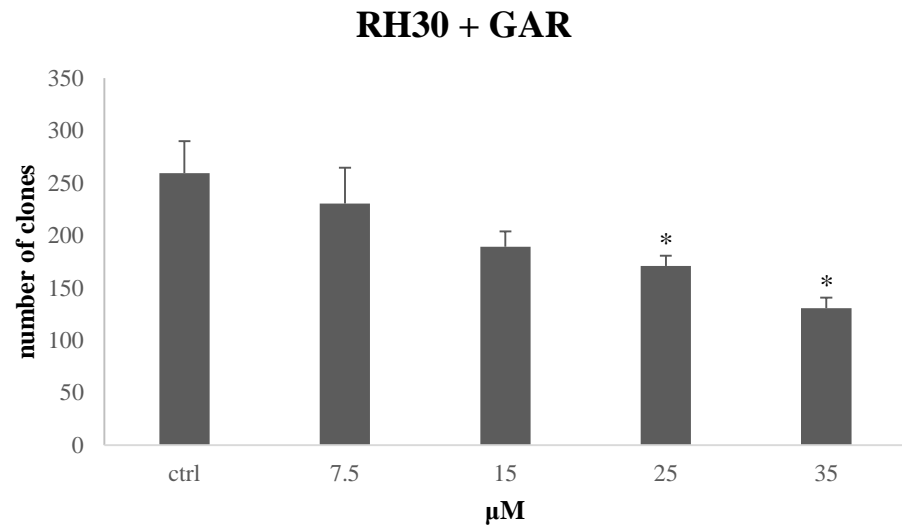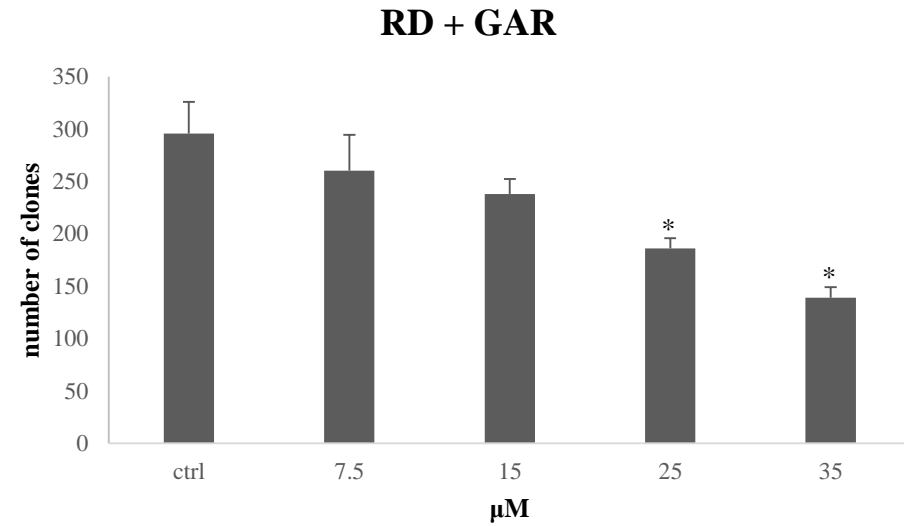

**Supplementary Figure S1.** Assessment of clonogenicity of RMS cells in the presence of AA: 15, 30, 55, 75  $\mu\text{M}$  and GAR: 2.5; 7.5; 15; 25; 35  $\mu\text{M}$ . Clonogenicty assay results plotted against number of clones. (\*) =  $p < 0.05$  vs control (untreated) cells.

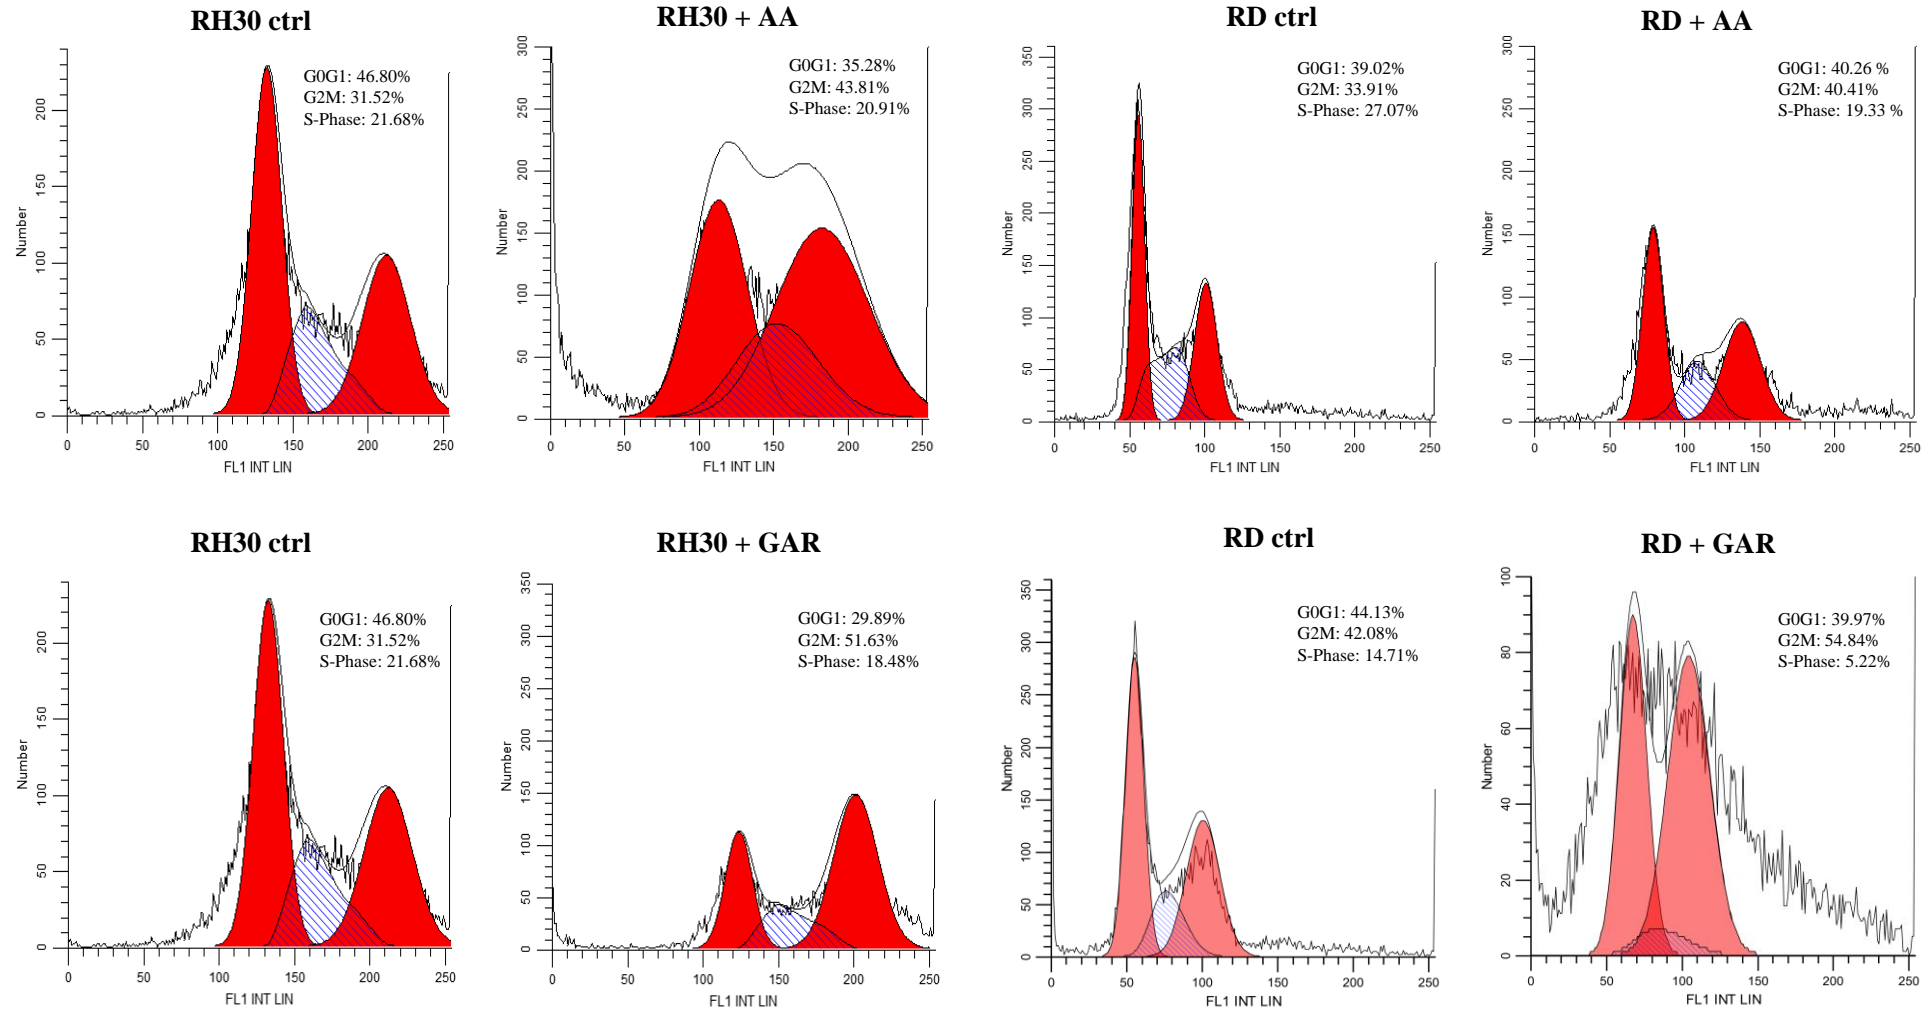

**Supplementary Figure S2.** Representative graphs of the evaluation of the cell cycle shift of RMS cells under the influence of high doses of AA (55  $\mu$ M) and GAR (25  $\mu$ M). Percentages indicate number of cells in particular phase of the cell cycle.

**RH30 ctrl**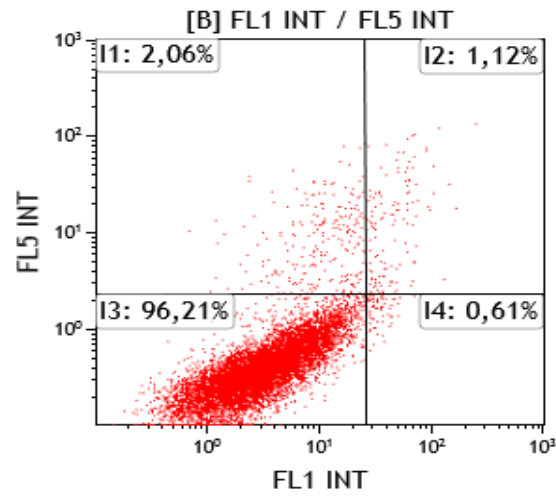**RH30 + AA**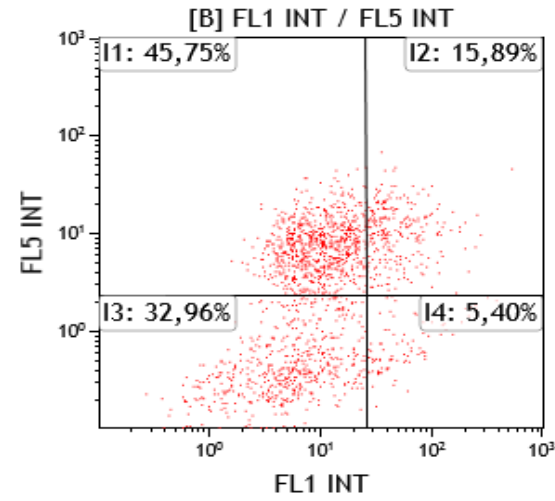**RD ctrl**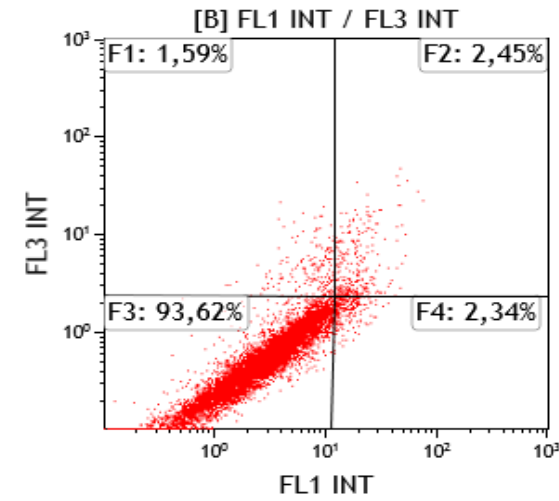**RD + AA**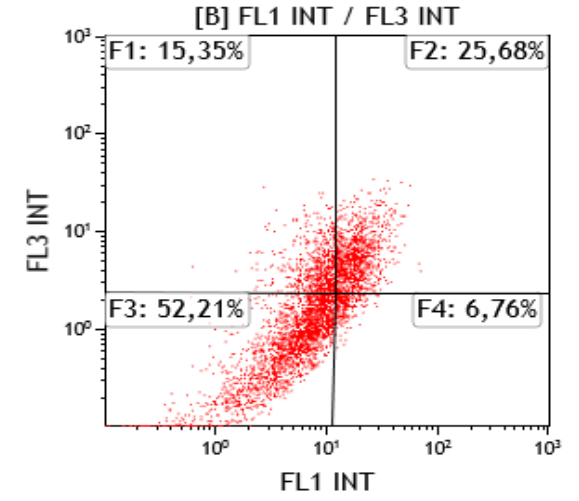**RH30 ctrl**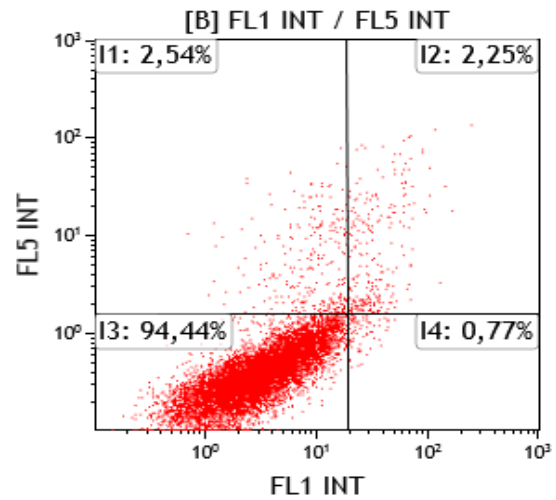**RH30 + GAR**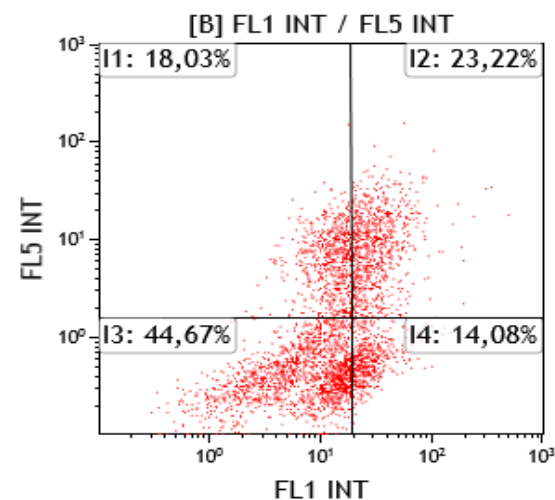**RD ctrl**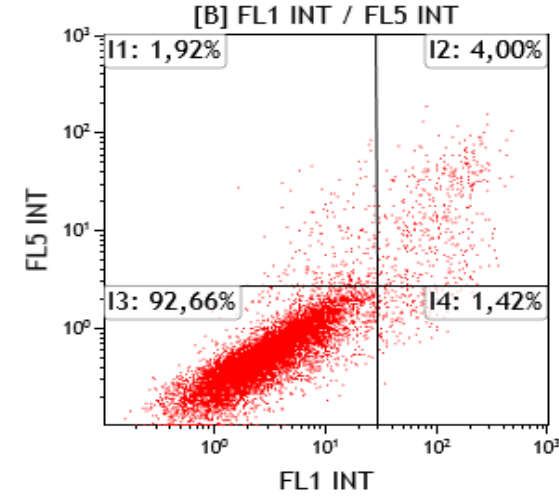**RD + GAR**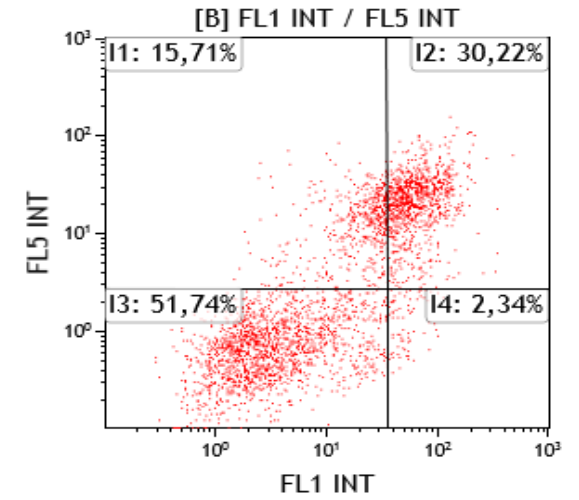

**Supplementary Figure S3.** Representative plots of the evaluation of the apoptosis of RMS cells under the influence of high doses of AA (55  $\mu$ M) and GAR (25  $\mu$ M). Percentages indicate number of cells in particular stages of apoptosis.
